1

2

3 **Single-cell RNA-seq highlights heterogeneity in**  
4 **human primary Wharton's Jelly mesenchymal**  
5 **stem/stromal cells cultured *in vitro***

6

7 Changbin Sun,<sup>1,2,3,4</sup> Lei Wang,<sup>2, 3,4</sup> Hailun Wang<sup>5</sup>, Tingrun Huang<sup>3,4</sup>, Xi Zhang<sup>2, 3, 4, \*</sup>

8 <sup>1</sup> BGI Education Center, University of Chinese Academy of Sciences, Shenzhen 518083, China

9 <sup>2</sup> BGI-Shenzhen, Shenzhen 518083, China

10 <sup>3</sup> China National GeneBank, BGI-Shenzhen, Shenzhen 518120, China

11 <sup>4</sup> James D. Watson Institute of Genome Science, Hangzhou 310008, China

12 <sup>5</sup> Department of Radiation Oncology, School of Medicine, Johns Hopkins University, Baltimore, MD  
13 21218, United States

14 \* Correspondence: E-mail address: zhangxi1@genomics.cn

15

16

17

18

19

20

21

22

23

24

25

26

## 27 **SUMMARY**

28 Mesenchymal Stem/Stromal cells (MSCs) are multipotent cells with promising  
29 application potential in regenerative medicine and immunomodulation. However,  
30 MSCs cultured *in vitro* exhibit functional heterogeneity. The underlying molecular  
31 mechanisms that define MSC heterogeneity remain unclear. Here, we investigated  
32 gene-expression heterogeneity of human primary Wharton's Jelly-derived MSCs  
33 (WJMSCs) cultured *in vitro* via single-cell RNA-seq. At the single-cell level, highly  
34 variable genes (HVGs) are associated with functional characteristics of classic MSCs.  
35 Differentially expressed genes analysis revealed the existence of several distinct  
36 subpopulations exhibit different functional characteristics associated with  
37 proliferation, development, and inflammation response. By comparing our WJMSCs  
38 data with a public available adipose-derived MSCs (ADMSCs) single cell  
39 transcriptomic data, we found that HVGs from these two studies are largely  
40 overlapped and have similar functional enrichment. Taken together, these results  
41 suggested that these HVGs hold the potential to be used as candidate markers for  
42 further potency association studies.

43

44

45

46

47

48

## 49 INTRODUCTION

50 Mesenchymal Stem/Stromal cells (MSCs) are multipotent with self-renewal capacity  
51 and can be derived from various tissues, including bone marrow (Prockop, 1997),  
52 adipose tissue (Zuk et al., 2002), umbilical cord (Romanov et al., 2003; Wang et al.,  
53 2004), placenta (Fukuchi et al., 2004) etc. Besides the multi-lineage potential to  
54 differentiate into various cell types, such as chondrocytes, osteocytes, adipocytes,  
55 myocytes, and neuronal cells (Gao et al., 2016; Pittenger et al., 1999), MSCs could  
56 modulate immune cell response via interaction with lymphocytes from both the innate  
57 and adaptive immune system to deliver immunosuppressive and anti-inflammatory  
58 effects after homing to sites of inflammation *in vivo* (Aggarwal and Pittenger, 2005;  
59 Ren et al., 2008). Furthermore, human MSCs could be cultured in large scale and  
60 have minimal functional loss after long-term cryopreservation (Ikebe and Suzuki,  
61 2014; Parekkadan and Milwid, 2010). Therefore, MSCs demonstrate promising  
62 utilization potential and are ideal cell types in both fundamental and translational  
63 biology fields, such as developmental biology, cellular therapy, immunomodulation,  
64 and regenerative medicine (Abdallah and Kassem, 2008; Baksh et al., 2004).  
65 Currently, more than 700 clinical trials have been registered in ClinicalTrials.gov  
66 (<http://www.clinicaltrials.gov>), which utilize MSCs for cellular therapy.  
67 Transplantation of MSCs demonstrates no obvious adverse effect, regardless of  
68 allogeneic or autologous cell origin, and has been extensively explored in treatment of  
69 various disease types, such as bone and cartilage defects (Krampera et al., 2006;  
70 Wakitani et al., 2002), cardiovascular disease (Chen et al., 2004; Ranganath et al.,

71 2012), neurological degeneration (Karussis et al., 2010; Mazzini et al., 2010), liver  
72 disorder (Kharaziha et al., 2009), and immunological diseases (Ghannam et al., 2010;  
73 Le Blanc et al., 2008) with encouraging clinical outcomes. Several MSC-based  
74 products have been approved or conditionally approved in certain country or district  
75 to treat disorders, such as graft versus host disease (GvHD), Crohn's-related  
76 enterocutaneous fistular disease (Galipeau and Sensebe, 2018).

77 The minimal criteria for defining multipotent MSCs was published by  
78 International Society for Cellular Therapy (ISCT) in 2006 (Dominici et al., 2006),  
79 which is widely accepted and adopted in both basic research and industrial application.  
80 However, it only defines basic morphological and functional characteristic. More and  
81 more research works have recognized that MSCs populations exhibit tissue-to-tissue  
82 functional variation (Jin et al., 2013; Yoo et al., 2009), as well as inter-population  
83 heterogeneity when using current markers to define MSCs, which makes it difficult to  
84 predict cell population dynamics and functional alterations after extended culture or  
85 exposed to extrinsic factors (Russell et al., 2010; Samsonraj et al., 2015). Functional  
86 heterogeneity coupled with large-scale expansion in clinical manufacturing process  
87 may explain, in part, why data across MSC-based clinical trials are largely  
88 incongruent (Phinney, 2012). During MSCs culturing and passaging, the competition  
89 and balance between different subpopulations may change, resulting in decrease in  
90 proportion or even loss of certain subpopulations and ultimately leading to alterations  
91 in cell function and treatment outcomes in clinical studies (Bustos et al., 2014; Sethe  
92 et al., 2006). Therefore, there is an urgent need to elucidate whether certain MSC

93 subtype, or a cocktail of defined population of different subtypes can demonstrate  
94 effectiveness during cellular therapy and tissue engineering. Investigation into the  
95 underlying molecular mechanisms that define MSCs heterogeneity will facilitate  
96 subtypes identification and improve methods for cell isolation and expansion *in vitro*.  
97 By in-depth analysis of cell quality attributes, it will also help to interpret the results  
98 from clinical trials and eventually improve clinical efficacy of MSCs products.

99       Recently, single-cell RNA sequencing (scRNA-seq) technology, which allows  
100 massive parallel analysis of gene expression profiles at single-cell level, has become a  
101 powerful tool in investigating tissue and cell heterogeneity. It provides unprecedented  
102 opportunities for identifying subpopulations that share a common gene-expression  
103 profile in a heterogeneous cell population (Tang et al., 2009). Here, we investigated  
104 the gene-expression profile via scRNA-seq of human primary WJMSCs cultured in  
105 vitro from three donors. In contrast to other sources derived MSCs, WJMSCs, which  
106 isolated from previously discarded umbilical cord tissues, bear higher proliferation  
107 rate and the strongest immunomodulatory effect, making them an attractive  
108 alternative source of MSCs for clinical research and application (Li et al., 2014;  
109 Troyer and Weiss, 2008). Meanwhile, we analyzed public available ADMSC  
110 scRNA-seq data (Liu et al., 2019), and performed transcriptome comparison between  
111 WJMSCs and ADMSCs at the single-cell level. GO enrichment analysis of highly  
112 variable genes (HVGs) obtained from WJMSCs revealed that those gene products are  
113 significantly enriched in extracellular region with binding function, involved in  
114 developmental process, signal transduction, cell proliferation, etc. biological

115 processes. Moreover, pathway analysis showed that those HVGs are associated with  
116 functional characteristics of classic MSCs, such as inflammation mediated by  
117 chemokine and cytokine signaling, integrin signaling, and angiogenesis. After  
118 regressing out the batch and cell cycle effects, those HVGs were used for dimension  
119 reduction and clustering analysis to identify candidate subpopulations. Differentially  
120 expressed genes analysis revealed the existence of several distinct subpopulations of  
121 MSCs that exhibit diverse functional characteristics related to proliferation,  
122 development, and inflammation response etc. Although WJMSCs and ADMSCs were  
123 derived from different tissues and displaying different differentiation potency, their  
124 HVGs were largely overlapped and had similar functional enrichment. Taken together,  
125 these results indicated that genes expression are highly varied among individual  
126 MSCs in culture. They are involved in different signaling pathways regulating  
127 individual cells response to the extracellular environment, which could eventually  
128 impact on population differentiation behavior and immunomodulation potency. Thus,  
129 those genes may serve as candidate markers for further potency association study.

## 130 **RESULTS**

### 131 **Overview of WJMSCs Single-cell RNA Sequencing Data**

132 To investigate into inter-population heterogeneity in primary cultured WJMSCs at the  
133 single-cell transcriptome level, primary cells isolated from three human umbilical  
134 cord (two females and one male, named as UC1, UC2, UC3 respectively) were  
135 collected and used for scRNA-seq. Total about  $5 \times 10^8$  raw reads with high quality for

136 each donor were obtained (Figure S1A). Mapping these reads to human GRCh38  
137 genome, average about 56.90 % and 61.03 % reads were mapped confidently to  
138 transcriptome and exonic regions, respectively (Figures S1B and S1C). Briefly, total 6  
139 878 cells (filtered matrix) were obtained from the three donors, average 2 293 cells  
140 for each, with 209 769 mean reads, 38 983 medium unique molecular identifiers  
141 (UMI) counts and 6 279 median genes per cell (Figures S1D-S1F), suggesting that our  
142 data were of high quality.

143 According to the minimal criteria proposed by the International Society for  
144 Cellular Therapy (ISCT) in 2006 (Dominici et al., 2006), MSC must express three  
145 positive markers, i.e. *CD105 (ENG)*, *CD73 (NT5E)* and *CD90 (THY1)*, and lack  
146 expression of several negative genes, including *CD45 (PTPRC)*, *CD34*, *CD14* or  
147 *CD11b (ITGAM)*, *CD79a (CD79A)* or *CD19* and *HLA-DR (HLA-DRA* and  
148 *HLA-DRB1)*. When we looked at the expression of those markers in our raw data, we  
149 saw the expression of those positive markers (UMI > 0), while negative genes were  
150 not expressed (UMI = 0) in most cells (Figure 1A). Next, we ranked cluster of  
151 differentiation (CD) genes by average normalized expression or percentage of cells  
152 with at least one UMI across all cells (Table S1). Classic cell surface markers for  
153 MSC definition, including *ENG*, *NT5E*, and *THY1*, as expected, belong to the top50  
154 highly expressed CDs (Figure 1B). Among the CDs, integrins, such as *ITGB1*, *ITGA1*,  
155 *ITGA2*, *ITGA5*, etc., which play important role in MSCs morphology, migration,  
156 proliferation, differentiation and survival (Docheva et al., 2007; Hamidouche et al.,  
157 2009; Olivares-Navarrete et al., 2011), also highly expressed in WJMSC population

158 (Figure 1B and Table S1). In addition, we assayed the tri-lineage capability of the  
 159 cultured WJMSCs for scRNA-seq, and results confirmed that they have the potency to  
 160 differentiate into osteoblasts, adipocytes and chondroblasts *in vitro* (Figure S1G).

161

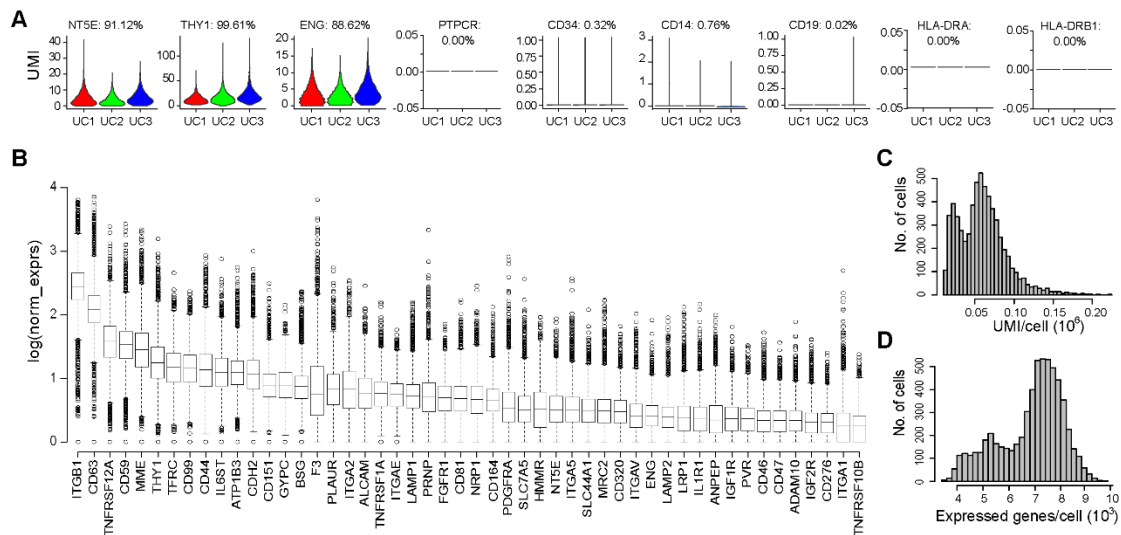

162

163 **Figure 1. Overview of WJMSC single-cell RNA-seq data.**

164

165 (A) Expression of marker genes in the three samples. Number on the top showing percentage of cells  
 166 with at least one UMI.

166

167 (B) Boxplot showing top 50 cluster of differentiation (CD) genes ranked by average normalized  
 168 expression.

168

169 (C) Distribution of UMI cross cells after pre-processing to filter out low-quality cells.

169

170 (D) Distribution of expressed genes after pre-processing to filter out low-abundance genes with  
 171 mean-based method (genes with means more than 0.1 were retained).

171

172

For further analysis, we filtered outlier cells using the median absolute deviation

173

from the median total library size (logarithmic scale), total gene numbers (logarithmic

174

scale), as well as mitochondrial percentage for each donor (Lun et al., 2016). Totally,

175

702 outlier cells were removed and 6 176 single cells were kept by median absolute

176

deviation method. Considering none or low abundant expressed genes across cells, we

177

also integrated these three data together and removed any gene with average

178

expression less than 0.1 UMI. Finally, 6 176 high quality single cells with 11 458



179 expressed genes were passed on to downstream analysis. Across the cells, number of  
 180 UMI per cell ranged from 13 121 to 221 432, and number of genes from 3 543 to 9  
 181 775 (Figures 1C and 1D).

182

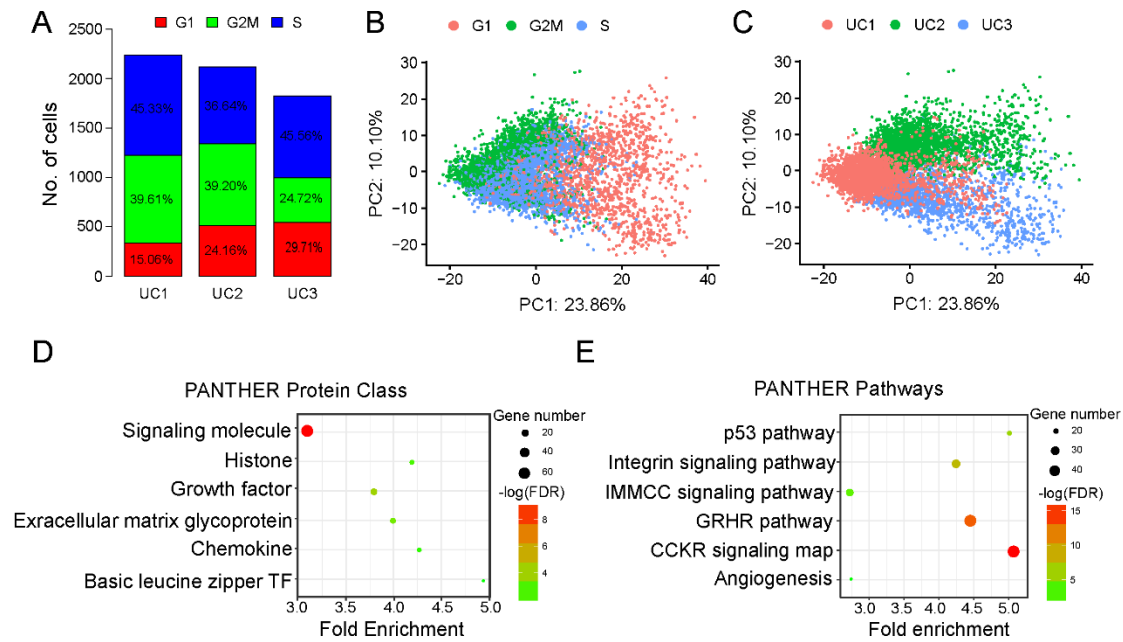

183

184 **Figure 2. Heterogeneity and highly variable genes in WJMSCs.**

185 (A) Phases of cell cycle assigned for each of the three samples.

186 (B and C) Cell cycle effects (B) and batch effects (C) represent the dominant source of heterogeneity in  
 187 primary cultured WJ-MSCs population.

188 (D) Results of pathway enrichment analysis for highly variable genes identified in WJMSCs.

189 (E) Results of protein class enrichment analysis for highly variable genes identified in WJMSCs.

190 IMMCC: Inflammation mediated by chemokine and cytokine; GRHR: Gonadotropin-releasing hormone  
 191 receptor.

192

### 193 **Highly Variable Genes Identified in WJMSCs**

194 Considering cell cycle effect may influence gene expression, we first assigned cell  
 195 cycle phases state to each cell. Results showed that average 22.98 %, 34.51 %, and  
 196 42.51 % cells assigned to G1, G2/M, and S cell cycle phase, respectively (Figure 2A),  
 197 suggesting that *in vitro* cultured WJMSCs are highly proliferated population. Principle

198 components (PCs) analyzed without removing unwanted sources of variation  
199 demonstrated that PC1, counting for 23.86 % variance, is mainly caused by cell cycle  
200 effect (Figure 2B), while PC2 counting for 10.10 % variance (Figure 2C), results from  
201 donor-to-donor variation or batch effect. Thus, we selected overlapped highly variable  
202 genes among each phase for each donor as mentioned in the supplemental method  
203 section and totally got 770 genes defined as HVGs for the following analysis (Figures  
204 S2A-S2D and Table S3).

205 Highly variable genes (HVGs) exhibiting high variability across cells represent  
206 heterogeneous features within a cell population (Pijuan Sala et al., 2019; Yip et al.,  
207 2018). Here, we investigated gene functional enrichment of HVGs identified in  
208 WJMSCs population. Interestingly, protein class analysis demonstrated that those  
209 genes were overrepresented in signaling molecules, growth factors, extracellular  
210 matrix protein, chemokine, histone, and basic leucine zipper transcription factor  
211 (Figure 2D). Besides, pathway analysis exhibited that these highly variable genes  
212 expressed cross cells were enriched in integrin signaling pathway, inflammation  
213 mediated by chemokine and cytokine signaling pathway, gonadotropin-releasing  
214 hormone receptor pathway, p53 pathway and angiogenesis (Figure 2E). Furthermore,  
215 GO enrichment analysis showed that those HVGs are significantly enriched in  
216 extracellular region (Figure S2E) with binding function, such as protein binding, and  
217 cytokine receptor binding, etc. (Figure S2G), involved in biological processes like  
218 developmental process, signal transduction, cellular component morphogenesis, cell  
219 communication, cell proliferation, etc. (Figure S2F). Micro-environmental interaction

220 is crucial for morphogenesis, cell differentiation, homeostasis, cell growth (Frantz et  
221 al., 2010; Rozario and DeSimone, 2010). Therefore, variations in the expression of  
222 those extracellular functioning genes identified in our analysis could influence  
223 interaction of MSCs with micro-environment and cell fate determination (Even-Ram  
224 et al., 2006; Guilak et al., 2009). Furthermore, our results showed that highly variable  
225 genes in WJMSC population were enriched in distinct biological functions of MSCs,  
226 such as anti-inflammation (Figure 2E), regeneration (Figure S2F), wound healing  
227 (Figure S2G), etc., which can potentially be separated and purified to test their  
228 therapeutic efficacy in clinical application.

### 229 **Characteristics of Candidate Subpopulations in WJMSCs**

230 To remove batch and cell cycle effects, we scaled the data and performed linear  
231 regression to regress the effects out before candidate subpopulations clustering. Here,  
232 we used regularized negative binomial regression method to perform normalization  
233 and variance stabilization of our scRNA-seq data, which is an appropriate distribution  
234 to model UMI count data from a 'homogeneous' single cell population suggested by  
235 (Hafemeister and Satija, 2019). Results of nonlinear dimensional reduction performed  
236 by UAMP showed that the cells were obviously separated by cell cycle and batch  
237 effects before regression, while cells were well mixed after regression and scaling  
238 (Figure S3A), implying that those unwanted sources of variation have been effectively  
239 removed.

240 Next, we performed cell cluster analysis by a graph-based clustering approach

241 (Macosko et al., 2015), and six candidate clusters in primary cultured WJMSCs were  
242 identified (Figure 3A). To study the molecular and functional characteristics of these  
243 candidate subpopulations in WJMSCs, we performed differentially expressed genes  
244 (DEGs) analysis among the six clusters (C0-C5). (Table S4, Figure 3B). Intriguingly,  
245 *MKI67* (Marker of Proliferation Ki-67), a gene strongly associated with cell  
246 proliferation and growth, expressed at higher levels in subpopulations C0 and C1  
247 compared with others, implying that subpopulations C0 and C1 possess a higher  
248 proliferative capacity. Results of GO enrichment analysis showed that DEGs  
249 upregulated in C0 were significantly enriched in DNA replication pathway and cell  
250 cycle process as well (Figures 3C and 3D). Besides, several histone genes, such as  
251 *HIST1H4C*, *HIST1H1C*, exhibited higher expression levels in subpopulations C1  
252 (Figure 3B). Contrarily, cells in C5 displayed aging characteristics, although  
253 proportion of which is very small in the total populations, and almost all these cells  
254 assigned to G1 phase belonging to UC1 sample (Figure S3B). We thought that cells in  
255 subpopulation C5 may have experienced mutation or replicative senescence during  
256 expansion and they were removed from the following analysis. Across those  
257 candidate subpopulations, several markers of MSCs showed similar expression level  
258 (Figure 3E). Meanwhile, we noted that collagen and chemokine genes across these  
259 subpopulations were differentially expressed. Specially, expression of collagen genes  
260 was much higher in C3 while expression of chemokine genes was higher in C4  
261 (Figures S3C and S3D). Furthermore, we identified several candidate surface markers,  
262 which could be used to sort those subpopulations for further physiological and

263 functional studies (Figure 3F).

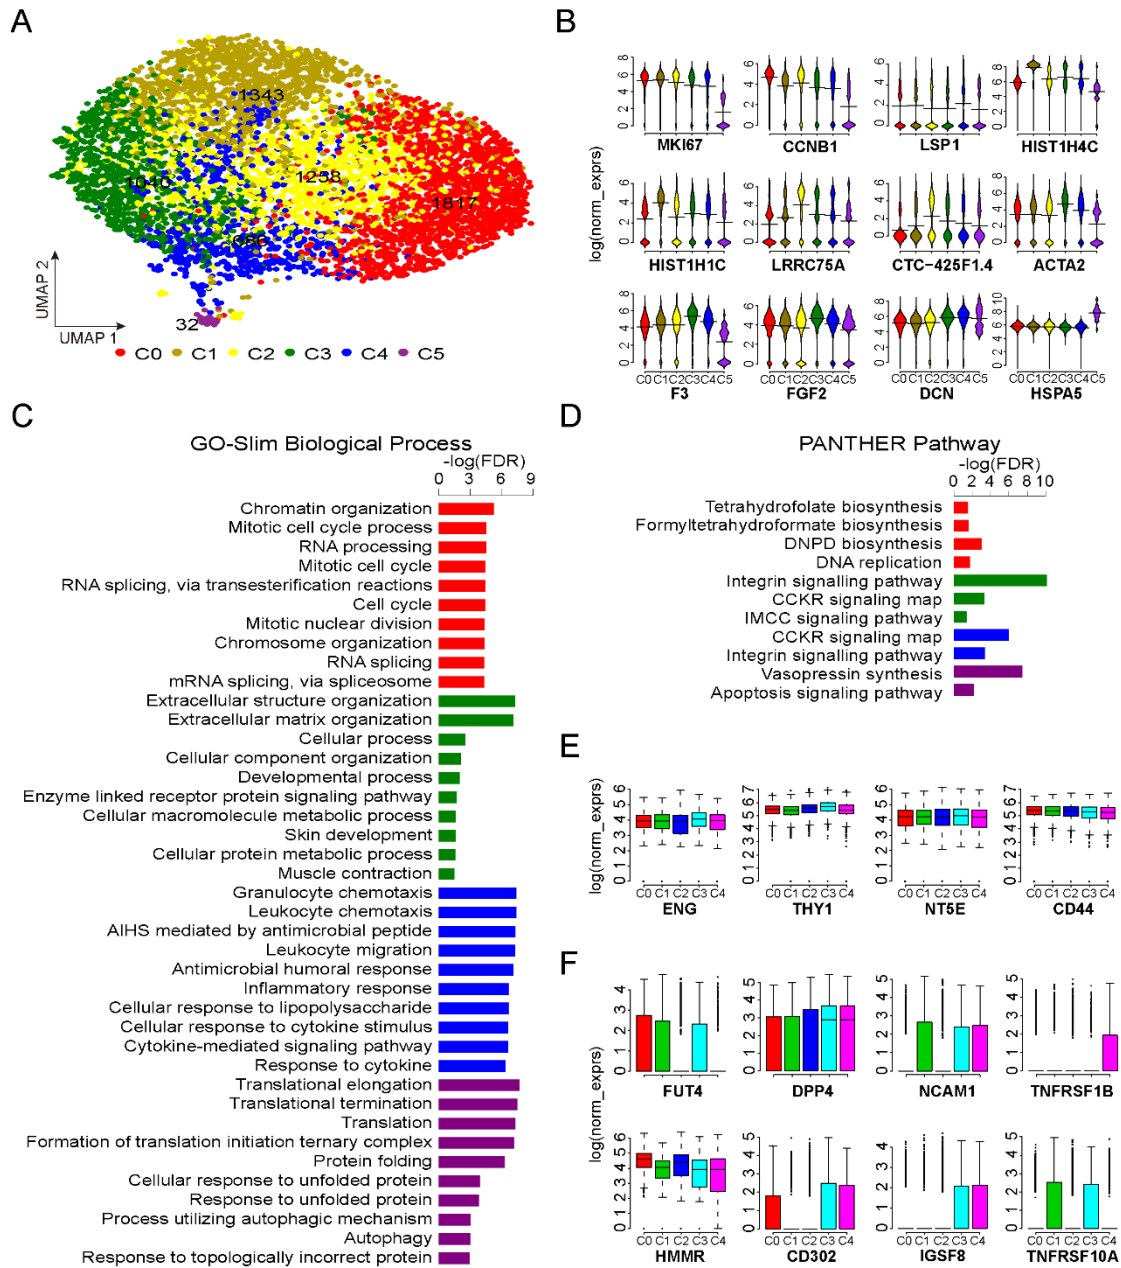

264

265 **Figure 3. Candidate subpopulations with different functional characteristics.**

266 (A) UMAP visualizing the results of cell clustering.

267 (B) Bean plots showing expression of several DEGs among the six subpopulations.

268 (C) Pathways significantly enriched for the genes differentially expressed in one subpopulation  
269 compared to others.

270 (D) GO-slim biological process enriched for the genes differentially expressed in one subpopulation  
271 compared to others

272 (E) Boxplots showing expression of classic MSC marker genes in subpopulations.

273 (F) Example of candidate markers showing different expression pattern among the five subpopulations

274 (C0-C4). C0, red; C1, olive; C2, yellow; C3, green; C4, blue; C5, purple. IMCC: Inflammation

275 mediated by chemokine and cytokine; DNPd: De novo pyrimidine deoxyribonucleotide.

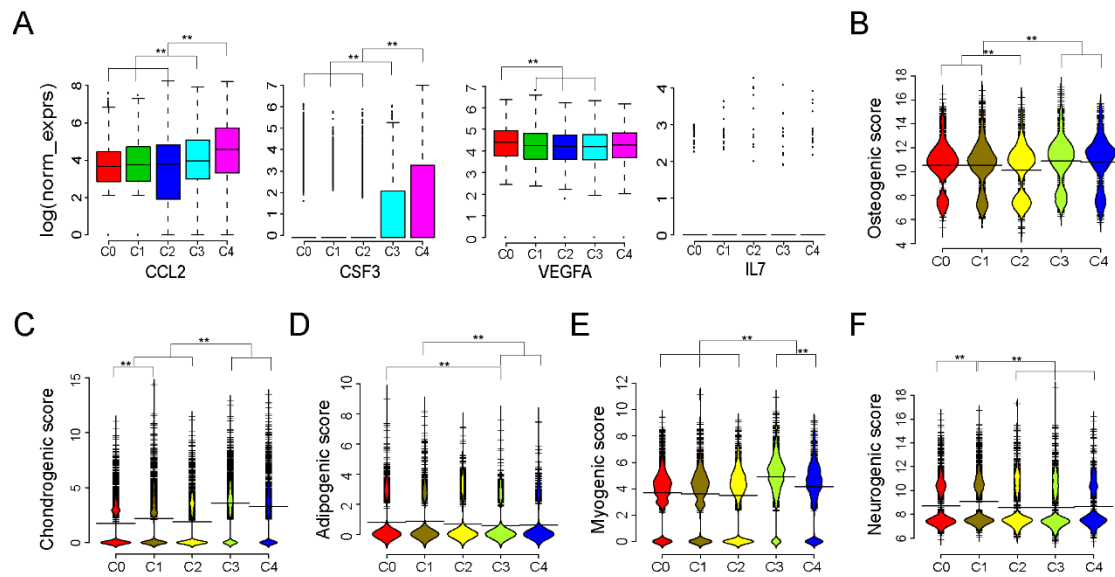

276

277 **Fig 4. Candidate subpopulations showing different predicted potency on differentiation and**  
278 **immunosuppression.**

279 (A) Boxplots showing expression of genes correlated with PBMC suppression across the five candidate  
280 subpopulations (C0–C4).

281 (B-F) Bean plots showing distribution of log (normalized expression) values of osteogenic score (B),  
282 chondrogenic score (C), adipogenic score (D), myogenic score (E), and neurogenic score (F) across the  
283 five candidate subpopulations (C0–C4). Wilcoxon Rank Sum test were performed for significant test,  
284 \*\* P < 0.001.

285

286 In terms of MSC function, on which the MSC clinical application were  
287 theoretically based, the DEGs upregulated in subpopulations C3 were enriched in  
288 extracellular structure organization, developmental process, and muscle contraction,  
289 while DEGs upregulated in subpopulations C4 were associated with  
290 immunomodulation function (Figure 4A). Secretome analysis revealed that increased  
291 levels of some cytokines, such as CCL2, GCSF, VEGF, and IL-7, are positively  
292 correlated with immunosuppression (Chinnadurai et al., 2018). Among these  
293 subpopulation, expression levels of *CCL2* and *CSF3* are highest in C4 subpopulation  
294 (Figure S6F), implicating its immunomodulation therapeutic potential. Besides,  
295 lineage differentiation score among these subpopulations were different, indicating  
296 their distinct differentiation propensity to osteogenic, chondrogenic, adipogenic,

297 myogenic or neurogenic cells (Figures 4B-4F).

### 298 **Sing-cell Transcriptome Comparison between WJMSCs and ADMSCs**

299 To provide insights into the heterogeneity of MSCs, several previous studies have  
300 compared gene expression of MSCs isolated from different sources using bulk-cell  
301 transcriptomic profiles (Alhattab et al., 2019; Fong et al., 2011; Lee et al., 2004; Ma  
302 et al., 2019; Meng et al., 2019; Taşkıran and Karaosmanoğlu, 2019). However, even  
303 MSCs derived from the same tissue exhibited inter-population functional  
304 heterogeneity, such as different differentiation potency and proliferation capacity.  
305 Bulk RNA-seq measures the average expression of genes, which is the sum of cell  
306 type-specific gene expression weighted by cell type proportions. Bulk transcriptome  
307 comparisons may hide some meaningful information that can help to elucidate the  
308 underlying mechanisms of functional heterogeneity. Thus, here we compared  
309 transcriptome data at the single-cell level between WJMSCs and ADMSCs. As  
310 expected, a lot of highly expressed classic MSCs surface markers are shared between  
311 these two MSCs, including *ENG*, *NT5E*, *THY1*, and *CD44* (Figures 5A, 5B and Table  
312 S1). Meanwhile, some unshared CDs were identified (Figure 5B), which suggest  
313 phenotypic diversity between WJMSCs and ADMSCs. These unshared genes  
314 involved in different cell signaling pathways inferred from pathway enrichment  
315 analysis of the top50 CDs (Figure 5C). Not surprisingly, some of these unshared CDs,  
316 although ranked in the top 50 genes by average expression (Figures 1A and 5A), only  
317 expressed at high levels in a small proportion of the MSCs (Figure 5D). Some of the



318 unshared CDs are expressed (or not expressed) in majority of the MSCs derived from  
319 one tissue, but expressed only in a small proportion of the MSCs in the other one,  
320 such as *CD36*, which plays an important role in the formation of intracellular lipid  
321 droplets (Durandt et al., 2016), as well as *ITGA1*, *ITGA2*, and *PII6* (Figure 5D and  
322 Table S2). Those CD genes hold the potential to be used as markers for  
323 subpopulations sorting for further physiological and functional research. Accordingly,  
324 we also found that several markers, which have been reported to identify special MSC  
325 subpopulations with different biological functions, are expressed weakly in a small  
326 portion of MSCs, including *CD271 (NGFR)* (Battula et al., 2009; Kohli et al., 2019),  
327 *CD146 (MCAM)* (Espagnollet et al., 2014), *CXCR4*, *NES* (Morrison and Scadden,  
328 2014), *CD106 (VCAM1)* (Yang et al., 2013), except *PDGFRA*, which are highly  
329 expressed in most cells in WJMSC and ADMSC (Figure 5E and Table S2).

330 Increasing reports demonstrated that MSCs derived from different sources  
331 exhibited distinct biological properties, such as proliferative capacity, multi-lineage  
332 differentiation ability, and immunomodulation potency (Via et al., 2012), although  
333 they all meet the minimal criteria for defining multipotent MSCs. As regards the  
334 differentiation ability, we evaluated it by calculating lineage differentiation score  
335 using single cell gene expression data from WJMSCs and ADMSCs. Interestingly,  
336 density distributions of lineage score displayed two major peaks, while only one peak  
337 was observed in housekeeping genes analysis (Figures. 5F, 5G and S4A-S4D), which  
338 indicate the existence of multiple subpopulations in MSCs. Density distribution of  
339 osteogenic score showed that 77.15 % of cells in WJMSCs had high osteogenic score



340 vs. 42.69 % in ADMSCs (Figure. 5F). On the contrary, more cells (54.84 %) in  
341 ADMSCs have higher adipogenic score than in WJMSCs (22.12 %) (Figure 5G).  
342 These results suggested that WJMSCs have the propensity towards the osteogenic  
343 lineage while ADMSCs are inclined to differentiate into adipose cells, which are in  
344 line with previous studies (Li et al., 2014). Moreover, difference in other lineage  
345 differentiation potency are also existed, such as the chondrogenic and myogenic  
346 potential (Figures S4A and S4C).

347 Recently, human skeletal stem cell (SSC) and adipose progenitor cells were  
348 identified (Chan et al., 2018; Merrick and Sakers, 2019). Human SSC with  
349 PDPN<sup>+</sup>/CD146 (MCAM)<sup>-</sup>/CD73(NT5E)<sup>+</sup>/CD164<sup>+</sup> phenotype have the ability to  
350 generate progenitors of bone, cartilage, and stroma, but not fat (Chan et al., 2018).  
351 Human adipose progenitor cells expressed DPP4 are able to give rise to committed  
352 ICAM1<sup>+</sup> preadipocytes (Merrick and Sakers, 2019). To determine whether cultured  
353 MSCs consist of cells with phenotype as SSC or adipose progenitors, we analyzed  
354 single cell expression data with above marker genes. Notably, proportion of cells  
355 expressed SSC markers in WJMSC is much higher than in ADMSC (Figures S4E and  
356 S4F), while more cells with adipose progenitor's markers exist in ADMSC (Figures  
357 S4G and S4H). These results further indicated that bulk-cell variations among MSCs  
358 from different sources may originate from composition diversity of distinct  
359 subpopulations.

360

361

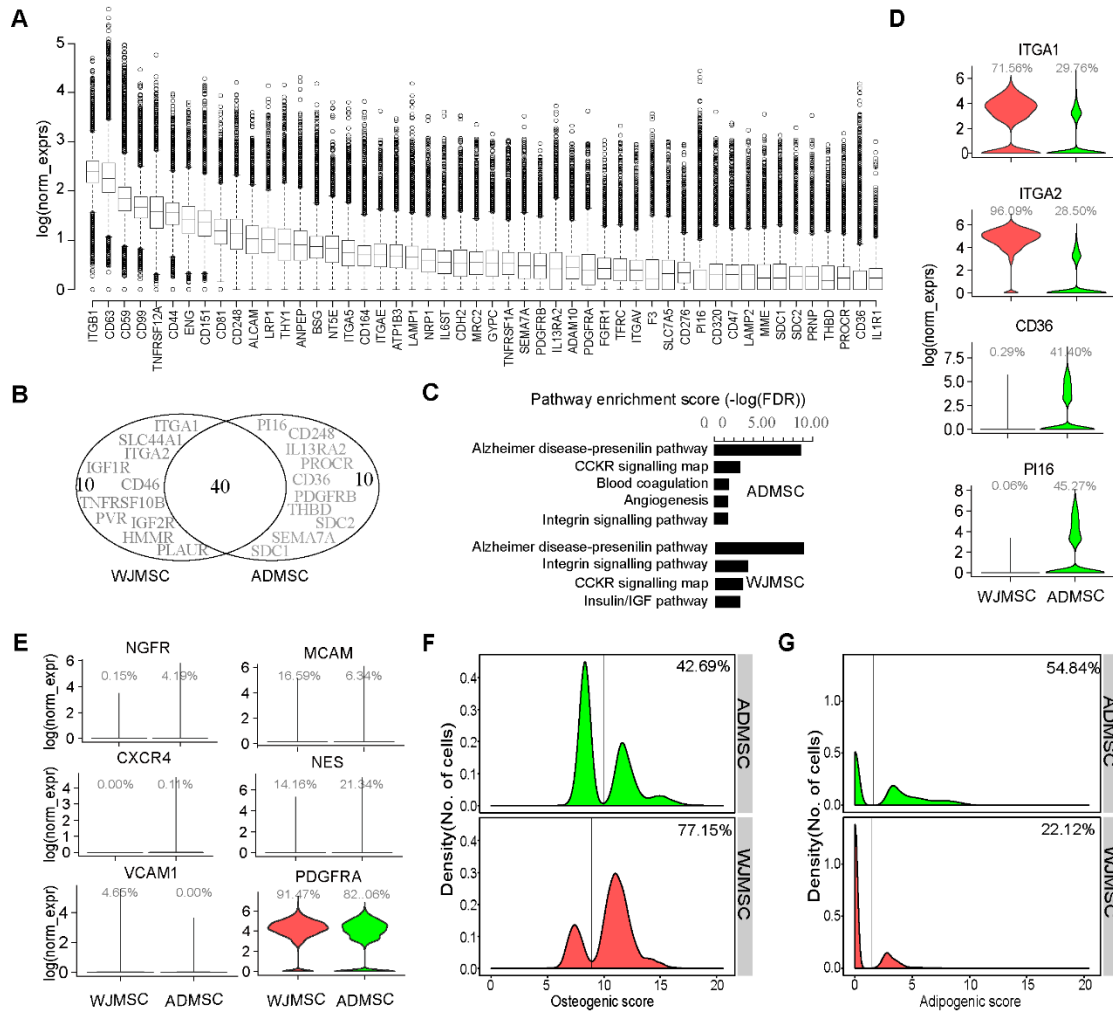

362

363 **Figure 5. Transcriptome Comparison at the single-cell level between WJMSC and ADMSC.**

364 (A) Boxplot showing the top 50 CD genes ranked by average normalized expression in ADMSCs.

365 (B) Venn diagram showing top 50 ADMSCs CD genes overlap with the top 50 WJMSC CD genes,  
366 unshared genes were highlighted.

367 (C) Pathway enrichment of top 50 CD genes expressed in ADMSC and WJMSC.

368 (D) Example of CD genes showing different expression percentage between ADMSC and WJMSC.

369 (E) Violin plots showing reported MSC subpopulations in ADMSC and WJMSC.

370 (F and G) Density distribution showing osteogenic score (F) and adipogenic score (G) between  
371 ADMSC and WJMSC. Percentage indicating proportion of cells assigned to the right side of the line.

372

## 373 DISCUSSION

374 MSCs are promising cell therapy products with great potential in promoting tissue

375 regeneration and modulating inflammation. However, significant variations were

376 reported during culturing MSCs that were isolated from different donors and different  
377 tissue sites. Unrefined, non-standardized isolation and culture techniques become the  
378 challenges of standardization in processes of MSC products manufacturing and  
379 quality management. Even in a “homogeneous” population, which defined by the  
380 classic minimal criteria, including cell size (Majore et al., 2009), morphology  
381 (Klinker et al., 2017; Marklein et al., 2019; Marklein et al., 2016), proliferation  
382 capacity (Majore et al., 2009), differentiation potency (Russell et al., 2010), and  
383 immunomodulation capacity (Klinker et al., 2017; Marklein et al., 2019), these cells  
384 still display phenotype and function heterogeneity among individual cells  
385 (Pevsner-Fischer et al., 2011). In previous clinical trials, functional variation and  
386 heterogeneity in MSCs are potentially the main reasons lead to inconsistent or  
387 controversial results (Phinney, 2012; Zhang et al., 2015). The underlying molecular  
388 mechanisms that lead to MSCs functional variation and heterogeneity at the cell  
389 population level remain unknown, which require further investigation and elucidation.

390 Recently, several studies have been performed to investigated into the  
391 heterogeneity of cultured MSCs by single cell transcriptomic analysis (Huang et al.,  
392 2019; Khong et al., 2019; Liu et al., 2019; Wang et al., 2019). Huang et al. profiled  
393 the transcriptomes of 361 single MSCs derived from two umbilical cords (UC-MSCs)  
394 that were harvested at different passages and stimulated with or without inflammatory  
395 cytokines. Following analysis, they concluded that *in vitro* expanded UC-MSCs are a  
396 well-organized population with limited heterogeneity, which is mainly caused by  
397 distinct distribution in cell cycle phases (Huang et al., 2019). However, the number of

398 cells sequenced for each condition is small (~50 cells per condition), and they did not  
399 remove the cell cycle effects for the subpopulations identification. Besides, the only  
400 one marker (HMMR) they used to sort the cells to confirm their hypothesis may be  
401 unable to isolate different subpopulations. Liu et al. performed a large-scale  
402 single-cell transcriptomic sequencing of 24 370 cultured ADMSCs from three donors  
403 (Liu et al., 2019). They regressed out batch and cell cycle effects before candidate  
404 subpopulation classification, however, the results they exhibited in the report were  
405 limited to the data analysis pipeline. Wang et al. sequenced a total of 103 single  
406 hWJMSCs from three umbilical cords and 63 single hBMMSCs cells from two  
407 different donors, and just focused on gene expression comparison between the two  
408 different sources derived MSCs (Wang et al., 2019). Thus, the cellular transcriptomic  
409 heterogeneity within a MSC population cultured *in vitro* still have not been  
410 comprehensively investigated at the single-cell level.

411 In this study, we dissected gene-expression heterogeneity of human primary  
412 WJMSCs cultured *in vitro* using scRNA-seq. Single-cell RNA sequencing  
413 technologies can offer an unbiased approach for understanding the extent,  
414 basis and function of gene expression variation between seemingly identical  
415 cells, revealing complex and rare cell populations, uncovering regulatory  
416 relationships between genes, and tracking the trajectories of distinct cell  
417 lineages in development (Gurtner et al., 2018; Tang et al., 2009). In primary  
418 WJMSCs, we found that the HVGs are significantly enriched in extracellular  
419 region with binding function, involved in developmental process, signal

420 transduction, cell proliferation, etc. For example, MKI67, a marker of proliferation,  
421 were identified as one of the HVGs, implying different proliferate capacity among  
422 individual cells. In terms of therapeutic potential, these genes are associated with  
423 functional characteristics of MSCs, such as integrin signaling pathway,  
424 angiogenesis, and inflammation mediated by chemokine and cytokine signaling  
425 pathway (Figure 2E). Integrin signaling pathway plays a critical role in homing of  
426 MSCs to bone, osteogenic differentiation, and bone formation, and even some  
427 integrins are suggested as targets to promote bone formation and repair (Di Maggio  
428 et al., 2017; Marie, 2013; Olivares-Navarrete et al., 2015). Several integrin genes  
429 were identified in our data with highly variable expression across the cells, such as  
430 *ITGA5* and *ITGB1*, which respectively encode  $\alpha 5$  and  $\beta 1$  and together form the  $\alpha 5\beta 1$   
431 integrin, a cell-surface receptor for fibronectin implicated in the control of  
432 osteoblastogenesis (Marie, 2013; Park et al., 2011). Pro-angiogenesis is one of the  
433 important biological properties of MSCs, implicating in promoting wound healing and  
434 tissue repair (Watt et al., 2013; Wu et al., 2007). Genes related to the angiogenesis,  
435 such as *ANGPT1*, *PDGFRA*, *VEGFA*, etc., were identified in our HVGs (Table S3).  
436 Studies have reported that *ANGPT1* gene-modified human MSCs could promote  
437 angiogenesis and reduce acute pancreatitis in rats (Hua et al., 2014), while *PDGFRA*<sup>+</sup>  
438 MSCs have enhanced skin repair/regeneration potential (Iinuma et al., 2015). *VEGFA*,  
439 and other two cytokines, *CXCL5* and *CXCL8* (IL-8), were required for the angiogenic  
440 activity of MSCs and have been selected as an assay matrix for angiogenic potency  
441 assay for MultiStem product (Galipeau et al., 2016; Lehman et al., 2012).

442 Furthermore, *in vitro* co-culture assays demonstrated that the increased levels of  
443 *VEGFA* and chemokine *CCL2* in MSCs were positively correlated with PBMC  
444 suppression (Chinnadurai et al., 2018). Chemokines, a family of small cytokines, are  
445 recognized as key mediators of MSCs migration and immunosuppression (Hocking,  
446 2015; Ren et al., 2008). Notably, most of the chemokines expressed in primary  
447 WJMSCs were highly heterogeneous, including above mentioned *CCL2*, *CXCL5*, and  
448 *CXCL8*. These results indicated that highly variable genes within WJMSCs are  
449 associated with classic MSC functional properties, and suggested the existence of  
450 potential subpopulations with different gene expression patterns.

451 Although cultured MSCs meet the minimal criteria with classic phenotype,  
452 increasing reports demonstrated that many cell surface membrane proteins are not  
453 uniformly expressed in MSC (Mo et al., 2016). Several subpopulations with different  
454 phenotype, property and therapeutic potential have been identified in MSCs derived  
455 from different tissues. Some subpopulations express *CXCR4* and have a propensity to  
456 migrate to sites of tissue injury (Cheng et al., 2008), while some express *VCAM-1*  
457 (*CD106*) and show priority in immunosuppression (Yang et al., 2013). However, these  
458 above reported markers only weakly expressed in WJMSCs (Figure 4E), may unable  
459 to serve as effective markers to isolated these subpopulations in WJMSCs. Here, we  
460 classified WJMSCs into several candidate subpopulations (C0-C5) with different  
461 functional characteristics. Among these candidate subpopulations, DEG analysis  
462 indicated that C0 and C1 show greater proliferation ability while C3 and C4 have  
463 greater osteogenic and chondrogenic differentiation potency. Myogenic score is also

464 significantly higher in C3, implying its potential in myocardial repair application. As  
465 to immunomodulation, we found most of the chemokines and some immune-related  
466 cytokines detected in WJMSCs upregulate in C4. Taken together, these candidate  
467 subpopulations identified in primary WJMSC would be valuable for further biological  
468 characterization via experimental investigations and clinical researches.

469 More and more clinical trials are being using MSCs to treat diverse diseases  
470 these days. However, challenges of developing potency assays for MSC-like products  
471 hinder their clinical applications, which include variability of tissue sources, largely  
472 undefined mechanisms of action in humans, and lack of reference standards  
473 (Chinnadurai et al., 2018; Galipeau and Krampera, 2015; Galipeau et al., 2016;  
474 Hematti, 2016). By comparing gene expression between WJMSCs and ADMSCs at  
475 the single-cell level, we found that HVGs identified in WJMSC are largely overlapped  
476 with ADMSC (Figure S5A), though there are unshared HVGs that might contribute to  
477 the differences in lineage potential. Furthermore, functional enrichment analysis of  
478 HVGs from ADMSC showed similar results as those from WJMSC (Figures  
479 S5B-S5G), suggesting that these HVGs play critical roles in MSCs, and may serve  
480 as candidate markers for further potency association studies.

481 In summary, highly variable genes within MSCs are significantly enriched in  
482 extracellular region with binding function, involved in developmental process, signal  
483 transduction, cell proliferation. Regarding therapeutic potential, these genes are  
484 associated with many functional characteristics of MSCs, including inflammation  
485 mediated by chemokine and cytokine signaling, integrin signaling, and angiogenesis.

486 Candidate subpopulations identified in MSCs also show different functional  
487 characteristics, such as proliferation, differentiation propensity, and  
488 immunosuppression potency. Further studies in cell-to-cell variability in  
489 transcriptome, proteome, secretome, and epigenome on MSCs derived from different  
490 tissues, will increase our understanding of the heterogeneity associated with MSC  
491 function and facilitate the development of MSC release criteria for clinical  
492 application.

493

## 494 **EXPERIMENTAL PROCEDURES**

### 495 **Cell Isolation and Culture**

496 This study was approved by the Ethics Committee of BGI-IRB. Human umbilical  
497 cord tissue were collected from naturally delivered full-term newborns (n = 3, two  
498 females and one male). WJs were isolated from umbilical cord after dissection and  
499 mechanically dissociated into tissue explants of approximately 2 mm<sup>2</sup>, which were  
500 then seeded into T75 flasks and cultured in UltraCULTURE™ Serum-free Medium  
501 (LONZA) at 37 °C with 5 % CO<sub>2</sub> in a humidified atmosphere.. After cell density  
502 reached about 80 % confluence, cells were dissociated with TrypLE™ Select  
503 (ThermoFisher Scientific) incubated at 37 °C for 5 min. The collected cells were  
504 immediately used for single cell library construction, sub-cultured into a new culture  
505 dish, tri-lineage differentiation potency test, or freezing in liquid nitrogen for  
506 long-term banking.



## 507 **scRNA-seq and Analysis**

508 scRNA-seq experiment was performed using the Chromium Single Cell Gene  
509 Expression Solution, V2 Chemistry (10x Genomics), following the manufacturer's  
510 protocol. Briefly, the collected cells were washed with PBS twice, and resuspended in  
511 500  $\mu$ l PBS, targeting the required 500 cells/ $\mu$ l concentration. We pipetted 6.4  $\mu$ l cell  
512 suspension, targeting the recovery of about 2 000 cells per sample. Single-cell  
513 RNA-seq libraries were obtained following the 10x Genomics recommended protocol,  
514 using the reagents included in the Chromium Single Cell 3' v2 Reagent Kit. Libraries  
515 were sequenced on the BGISEQ-500 (BGI) instrument (Natarajan et al., 2019) using  
516 26 cycles (cell barcode and UMI (Islam et al., 2014) ) for read1 and 108 cycles  
517 (sample index and transcript 3' end) for read2 , obtaining about  $5 \times 10^8$  raw paired  
518 reads.

519 scRNA-seq data analysis was available in the Supplemental Experimental  
520 Procedures for details. Briefly, the scRNA-seq data was processed using  
521 cellranger-2.0.0 for mapping. Outlier cells using the median absolute deviation from  
522 the median total library size (logarithmic scale), total gene numbers (logarithmic  
523 scale), as well as mitochondrial percentage, as implemented in scran package, using a  
524 cutoff of 3 (Lun et al., 2016). Any gene expressed across all the cells by average UMI  
525 less than 0.1 was removed. Cell cycle phase assignment and removal, highly variable  
526 genes identification, linear and nonlinear dimension reduction, clustering and  
527 differential expression analysis were performed using Seurat package (Butler et al.,  
528 2018).

## 529 **Functional Enrichment Analysis**

530 GO-slim, protein class and pathways overrepresentation Test enrichment analyses  
531 were performed using PANTHER™ Version 14.1 according to Mi et al. (Mi et al.,  
532 2019) via test type of Fisher's Exact, applying the Benjamini–Hochberg false  
533 discovery rate (FDR) correction for multiple testing.

## 534 **Lineage Differentiation Potency Evaluation**

535 Using the marker genes listed in Supplementary Table S5, we calculated osteogenic,  
536 adipogenic, chondrogenic, neurogenic, and myogenic ‘scores’ according to (Schwalie  
537 et al., 2018). Specifically, Score defined as a single numeric value representative of  
538 the expression of multiple marker genes, the sum of log normalized expression across  
539 all markers in a category. Housekeeping genes were also used and named as  
540 housekeeping score.

## 541 **ACCESSION NUMBERS**

542 The data that support the findings of this study have been deposited in the CNSA  
543 (<https://db.cngb.org/cnsa/>) of CNGBdb with accession number CNP0000562.

## 544 **SUPPLEMENTAL INFORMATION**

545 Supplemental Information includes Supplemental Experimental Procedures, five  
546 Figures, and five tables.

547 **AUTHOR CONTRIBUTIONS**

548 Conceptualization, C.S., and X.Z.; Methodology and Investigation, C.S., L.W., and  
549 T.H. Writing, C.S. and H.W.; Funding Acquisition, X.Z.

550 **ACKNOWLEDGMENTS**

551 This work was supported by Shenzhen Municipal Government of China (No.  
552 CYFWT201507021005 to X.Z.) and Science, Technology and Innovation  
553 Commission of Shenzhen Municipality under grant No. KQJSCX20170322143848  
554 413 to X.Z. The funders had no role in study design, data collection and analysis,  
555 decision to publish, or preparation of the manuscript. It was also supported by  
556 BGI-Shenzhen. The funder provided support in the form of salaries for C.S., L.W.,  
557 T.H., and X.Z., but did not have any additional role in the study design, data  
558 collection and analysis, decision to publish, or preparation of the manuscript. We  
559 thank members of China National GeneBank for technical support.

560

561

## 562 REFERENCES

- 563 Abdallah, B.M., and Kassem, M. (2008). Human mesenchymal stem cells: from basic biology to  
564 clinical applications. *Gene Ther* 15, 109-116.
- 565 Aggarwal, S., and Pittenger, M.F. (2005). Human mesenchymal stem cells modulate allogeneic  
566 immune cell responses. *Blood* 105, 1815-1822.
- 567 Alhattab, D., Jamali, F., Ali, D., Hammad, H., Adwan, S., Rahmeh, R., Samarah, O., Salah, B., Hamdan,  
568 M., and Awidi, A. (2019). An insight into the whole transcriptome profile of four tissue-specific human  
569 mesenchymal stem cells. *Regen Med*.
- 570 Baksh, D., Song, L., and Tuan, R.S. (2004). Adult mesenchymal stem cells: characterization,  
571 differentiation, and application in cell and gene therapy. *J Cell Mol Med* 8, 301-316.
- 572 Battula, V.L., Treml, S., Bareiss, P.M., Gieseke, F., Roelofs, H., de Zwart, P., Muller, I., Schewe, B.,  
573 Skutella, T., Fibbe, W.E., *et al.* (2009). Isolation of functionally distinct mesenchymal stem cell subsets  
574 using antibodies against CD56, CD271, and mesenchymal stem cell antigen-1. *Haematologica* 94,  
575 173-184.
- 576 Bustos, M.L., Huleihel, L., Kapetanaki, M.G., Lino-Cardenas, C.L., Mroz, L., Ellis, B.M., McVerry,  
577 B.J., Richards, T.J., Kaminski, N., Cerdenes, N., *et al.* (2014). Aging mesenchymal stem cells fail to  
578 protect because of impaired migration and antiinflammatory response. *Am J Respir Crit Care Med* 189,  
579 787-798.
- 580 Butler, A., Hoffman, P., Smibert, P., Papalexi, E., and Satija, R. (2018). Integrating single-cell  
581 transcriptomic data across different conditions, technologies, and species. *Nat Biotechnol* 36, 411-420.
- 582 Chan, C.K.F., Gulati, G.S., Sinha, R., Tompkins, J.V., Lopez, M., Carter, A.C., Ransom, R.C., Reinisch,  
583 A., Wearda, T., Murphy, M., *et al.* (2018). Identification of the Human Skeletal Stem Cell. *Cell* 175,  
584 43-56.e21.
- 585 Chen, S.L., Fang, W.W., Ye, F., Liu, Y.H., Qian, J., Shan, S.J., Zhang, J.J., Chunhua, R.Z., Liao, L.M.,  
586 Lin, S., *et al.* (2004). Effect on left ventricular function of intracoronary transplantation of autologous  
587 bone marrow mesenchymal stem cell in patients with acute myocardial infarction. *Am J Cardiol* 94,  
588 92-95.
- 589 Cheng, Z., Ou, L., Zhou, X., Li, F., Jia, X., Zhang, Y., Liu, X., Li, Y., Ward, C.A., Melo, L.G., *et al.*  
590 (2008). Targeted migration of mesenchymal stem cells modified with CXCR4 gene to infarcted  
591 myocardium improves cardiac performance. *Mol Ther* 16, 571-579.
- 592 Chinnadurai, R., Rajan, D., Qayed, M., Arafat, D., Garcia, M., Liu, Y., Kugathasan, S., Anderson, L.J.,  
593 Gibson, G., and Galipeau, J. (2018). Potency Analysis of Mesenchymal Stromal Cells Using a  
594 Combinatorial Assay Matrix Approach. *Cell reports* 22, 2504-2517.
- 595 Di Maggio, N., Martella, E., Frismantiene, A., Resink, T.J., Schreiner, S., Lucarelli, E., Jaquier, C.,  
596 Schaefer, D.J., Martin, I., and Scherberich, A. (2017). Extracellular matrix and alpha5beta1 integrin  
597 signaling control the maintenance of bone formation capacity by human adipose-derived stromal cells.  
598 *Sci Rep* 7, 44398.
- 599 Docheva, D., Popov, C., Mutschler, W., and Schieker, M. (2007). Human mesenchymal stem cells in  
600 contact with their environment: surface characteristics and the integrin system. *J Cell Mol Med* 11,  
601 21-38.
- 602 Dominici, M., Le Blanc, K., Mueller, I., Slaper-Cortenbach, I., Marini, F., Krause, D., Deans, R.,  
603 Keating, A., Prockop, D., and Horwitz, E. (2006). Minimal criteria for defining multipotent  
604 mesenchymal stromal cells. The International Society for Cellular Therapy position statement.

605 Cytotherapy 8, 315-317.

606 Durandt, C., van Vollenstee, F.A., Dessels, C., Kallmeyer, K., de Villiers, D., Murdoch, C., Potgieter,  
607 M., and Pepper, M.S. (2016). Novel flow cytometric approach for the detection of adipocyte  
608 subpopulations during adipogenesis. *J Lipid Res* 57, 729-742.

609 Espagnolle, N., Guilloton, F., Deschaseaux, F., Gadelorge, M., Sensebe, L., and Bourin, P. (2014).  
610 CD146 expression on mesenchymal stem cells is associated with their vascular smooth muscle  
611 commitment. *J Cell Mol Med* 18, 104-114.

612 Even-Ram, S., Artym, V., and Yamada, K.M. (2006). Matrix control of stem cell fate. *Cell* 126,  
613 645-647.

614 Fong, C.Y., Chak, L.L., Biswas, A., Tan, J.H., Gauthaman, K., Chan, W.K., and Bongso, A. (2011).  
615 Human Wharton's jelly stem cells have unique transcriptome profiles compared to human embryonic  
616 stem cells and other mesenchymal stem cells. *Stem cell reviews* 7, 1-16.

617 Frantz, C., Stewart, K.M., and Weaver, V.M. (2010). The extracellular matrix at a glance. *J Cell Sci* 123,  
618 4195-4200.

619 Fukuchi, Y., Nakajima, H., Sugiyama, D., Hirose, I., Kitamura, T., and Tsuji, K. (2004). Human  
620 placenta-derived cells have mesenchymal stem/progenitor cell potential. *Stem Cells* 22, 649-658.

621 Galipeau, J., and Krampera, M. (2015). The challenge of defining mesenchymal stromal cell potency  
622 assays and their potential use as release criteria. *Cytotherapy* 17, 125-127.

623 Galipeau, J., Krampera, M., Barrett, J., Dazzi, F., Deans, R.J., DeBruijn, J., Dominici, M., Fibbe, W.E.,  
624 Gee, A.P., Gimble, J.M., *et al.* (2016). International Society for Cellular Therapy perspective on  
625 immune functional assays for mesenchymal stromal cells as potency release criterion for advanced  
626 phase clinical trials. *Cytotherapy* 18, 151-159.

627 Galipeau, J., and Sensebe, L. (2018). Mesenchymal Stromal Cells: Clinical Challenges and Therapeutic  
628 Opportunities. *Cell stem cell* 22, 824-833.

629 Ghannam, S., Bouffi, C., Djouad, F., Jorgensen, C., and Noel, D. (2010). Immunosuppression by  
630 mesenchymal stem cells: mechanisms and clinical applications. *Stem Cell Res Ther* 1, 2.

631 Guilak, F., Cohen, D.M., Estes, B.T., Gimble, J.M., Liedtke, W., and Chen, C.S. (2009). Control of  
632 stem cell fate by physical interactions with the extracellular matrix. *Cell stem cell* 5, 17-26.

633 Gurtner, G.C., Hwang, B., Lee, J.H., and Bang, D. (2018). Single-cell RNA sequencing technologies  
634 and bioinformatics pipelines. *Stem Cells* 50, 96.

635 Hafemeister, C., and Satija, R. (2019). Normalization and variance stabilization of single-cell RNA-seq  
636 data using regularized negative binomial regression. *bioRxiv*, 576827.

637 Hamidouche, Z., Fromigue, O., Ringe, J., Haupl, T., Vaudin, P., Pages, J.C., Srouji, S., Livne, E., and  
638 Marie, P.J. (2009). Priming integrin alpha5 promotes human mesenchymal stromal cell osteoblast  
639 differentiation and osteogenesis. *Proc Natl Acad Sci U S A* 106, 18587-18591.

640 Hematti, P. (2016). Characterization of mesenchymal stromal cells: potency assay development.  
641 *Transfusion (Paris)* 56, 32s-35s.

642 Hocking, A.M. (2015). The Role of Chemokines in Mesenchymal Stem Cell Homing to Wounds. *Adv*  
643 *Wound Care (New Rochelle)* 4, 623-630.

644 Hua, J., He, Z.G., Qian, D.H., Lin, S.P., Gong, J., Meng, H.B., Yang, T.S., Sun, W., Xu, B., Zhou, B., *et*  
645 *al.* (2014). Angiopoietin-1 gene-modified human mesenchymal stem cells promote angiogenesis and  
646 reduce acute pancreatitis in rats. *Int J Clin Exp Pathol* 7, 3580-3595.

647 Huang, Y., Li, Q., Zhang, K., Hu, M., Wang, Y., Du, L., and Lin, L. (2019). Single cell transcriptomic  
648 analysis of human mesenchymal stem cells reveals limited heterogeneity. *10*, 368.

649 Iinuma, S., Aikawa, E., Tamai, K., Fujita, R., Kikuchi, Y., Chino, T., Kikuta, J., McGrath, J.A., Uitto, J.,  
650 Ishii, M., *et al.* (2015). Transplanted bone marrow-derived circulating PDGFRalpha+ cells restore type  
651 VII collagen in recessive dystrophic epidermolysis bullosa mouse skin graft. *J Immunol* *194*,  
652 1996-2003.

653 Ikebe, C., and Suzuki, K. (2014). Mesenchymal stem cells for regenerative therapy: optimization of  
654 cell preparation protocols. *BioMed research international* *2014*, 951512.

655 Islam, S., Zeisel, A., Joost, S., La Manno, G., Zajac, P., Kasper, M., Lonnerberg, P., and Linnarsson, S.  
656 (2014). Quantitative single-cell RNA-seq with unique molecular identifiers. *Nature methods* *11*,  
657 163-166.

658 Jin, H.J., Bae, Y.K., Kim, M., Kwon, S.J., Jeon, H.B., Choi, S.J., Kim, S.W., Yang, Y.S., Oh, W., and  
659 Chang, J.W. (2013). Comparative analysis of human mesenchymal stem cells from bone marrow,  
660 adipose tissue, and umbilical cord blood as sources of cell therapy. *International journal of molecular*  
661 *sciences* *14*, 17986-18001.

662 Karussis, D., Karageorgiou, C., Vaknin-Dembinsky, A., Gowda-Kurkalli, B., Gomori, J.M., Kassis, I.,  
663 Bulte, J.W., Petrou, P., Ben-Hur, T., Abramsky, O., *et al.* (2010). Safety and immunological effects of  
664 mesenchymal stem cell transplantation in patients with multiple sclerosis and amyotrophic lateral  
665 sclerosis. *Arch Neurol* *67*, 1187-1194.

666 Kharaziha, P., Hellstrom, P.M., Noorinayer, B., Farzaneh, F., Aghajani, K., Jafari, F., Telkabadi, M.,  
667 Atashi, A., Honardoost, M., Zali, M.R., *et al.* (2009). Improvement of liver function in liver cirrhosis  
668 patients after autologous mesenchymal stem cell injection: a phase I-II clinical trial. *Eur J*  
669 *Gastroenterol Hepatol* *21*, 1199-1205.

670 Khong, S.M.L., Lee, M., Kosaric, N., Khong, D.M., Dong, Y., Hopfner, U., Aitzetmuller, M.M.,  
671 Duscher, D., and Schafer, R. (2019). Single-Cell Transcriptomics of Human Mesenchymal Stem Cells  
672 Reveal Age-Related Cellular Subpopulation Depletion and Impaired Regenerative Function. *37*,  
673 240-246.

674 Klinker, M.W., Marklein, R.A., Lo Surdo, J.L., Wei, C.H., and Bauer, S.R. (2017). Morphological  
675 features of IFN-gamma-stimulated mesenchymal stromal cells predict overall immunosuppressive  
676 capacity. *114*, E2598-e2607.

677 Kohli, N., Al-Delfi, I.R.T., Snow, M., Sakamoto, T., Miyazaki, T., Nakajima, H., Uchida, K., and  
678 Johnson, W.E.B. (2019). CD271-selected mesenchymal stem cells from adipose tissue enhance  
679 cartilage repair and are less angiogenic than plastic adherent mesenchymal stem cells. *Sci Rep* *9*, 3194.

680 Krampera, M., Pizzolo, G., Aprili, G., and Franchini, M. (2006). Mesenchymal stem cells for bone,  
681 cartilage, tendon and skeletal muscle repair. *Bone* *39*, 678-683.

682 Le Blanc, K., Frassoni, F., Ball, L., Locatelli, F., Roelofs, H., Lewis, I., Lanino, E., Sundberg, B.,  
683 Bernardo, M.E., Remberger, M., *et al.* (2008). Mesenchymal stem cells for treatment of  
684 steroid-resistant, severe, acute graft-versus-host disease: a phase II study. *Lancet* *371*, 1579-1586.

685 Lee, R.H., Kim, B., Choi, I., Kim, H., Choi, H.S., Suh, K., Bae, Y.C., and Jung, J.S. (2004).  
686 Characterization and expression analysis of mesenchymal stem cells from human bone marrow and  
687 adipose tissue. *Cell Physiol Biochem* *14*, 311-324.

688 Lehman, N., Cutrone, R., Raber, A., Perry, R., Van't Hof, W., Deans, R., Ting, A.E., and Woda, J.  
689 (2012). Development of a surrogate angiogenic potency assay for clinical-grade stem cell production.  
690 *Cytotherapy* *14*, 994-1004.

691 Li, X., Bai, J., Ji, X., Li, R., Xuan, Y., and Wang, Y. (2014). Comprehensive characterization of four  
692 different populations of human mesenchymal stem cells as regards their immune properties,

693 proliferation and differentiation. *Int J Mol Med* 34, 695-704.

694 Liu, X., Xiang, Q., Xu, F., Huang, J., Yu, N., Zhang, Q., Long, X., and Zhou, Z. (2019). Single-cell  
695 RNA-seq of cultured human adipose-derived mesenchymal stem cells. *Scientific data* 6, 190031.

696 Lun, A.T., McCarthy, D.J., and Marioni, J.C. (2016). A step-by-step workflow for low-level analysis of  
697 single-cell RNA-seq data with Bioconductor. *F1000Research* 5, 2122.

698 Ma, J., Wu, J., Han, L., Jiang, X., Yan, L., Hao, J., and Wang, H. (2019). Comparative analysis of  
699 mesenchymal stem cells derived from amniotic membrane, umbilical cord, and chorionic plate under  
700 serum-free condition. *Stem Cell Res Ther* 10, 19.

701 Macosko, E.Z., Basu, A., Satija, R., Nemesh, J., Shekhar, K., Goldman, M., Tirosh, I., Bialas, A.R.,  
702 Kamitaki, N., Martersteck, E.M., *et al.* (2015). Highly Parallel Genome-wide Expression Profiling of  
703 Individual Cells Using Nanoliter Droplets. *Cell* 161, 1202-1214.

704 Majore, I., Moretti, P., Hass, R., and Kasper, C. (2009). Identification of subpopulations in  
705 mesenchymal stem cell-like cultures from human umbilical cord. *Science* 7, 6.

706 Marie, P.J. (2013). Targeting integrins to promote bone formation and repair. *Nat Rev Endocrinol* 9,  
707 288-295.

708 Marklein, R.A., Klinker, M.W., Drake, K.A., Polikowsky, H.G., Lessey-Morillon, E.C., and Bauer, S.R.  
709 (2019). Morphological profiling using machine learning reveals emergent subpopulations of  
710 interferon-gamma-stimulated mesenchymal stromal cells that predict immunosuppression. *Cytotherapy*  
711 21, 17-31.

712 Marklein, R.A., Lo Surdo, J.L., Bellayr, I.H., Godil, S.A., Puri, R.K., and Bauer, S.R. (2016). High  
713 Content Imaging of Early Morphological Signatures Predicts Long Term Mineralization Capacity of  
714 Human Mesenchymal Stem Cells upon Osteogenic Induction. *Stem Cells* 34, 935-947.

715 Mazzini, L., Ferrero, I., Luparello, V., Rustichelli, D., Gunetti, M., Mareschi, K., Testa, L., Stecco, A.,  
716 Tarletti, R., Miglioretti, M., *et al.* (2010). Mesenchymal stem cell transplantation in amyotrophic lateral  
717 sclerosis: A Phase I clinical trial. *Proc Natl Acad Sci U S A* 223, 229-237.

718 Meng, X., Sun, B., and Xiao, Z. (2019). Comparison in transcriptome and cytokine profiles of  
719 mesenchymal stem cells from human umbilical cord and cord blood. *Gene* 696, 10-20.

720 Merrick, D., and Sakers, A. (2019). Identification of a mesenchymal progenitor cell hierarchy in  
721 adipose tissue. 364.

722 Mi, H., Muruganujan, A., Huang, X., Ebert, D., Mills, C., Guo, X., and Thomas, P.D. (2019). Protocol  
723 Update for large-scale genome and gene function analysis with the PANTHER classification system  
724 (v.14.0). *Nat Protoc* 14, 703-721.

725 Mo, M., Wang, S., Zhou, Y., Li, H., and Wu, Y. (2016). Mesenchymal stem cell subpopulations:  
726 phenotype, property and therapeutic potential. *Cell Mol Life Sci* 73, 3311-3321.

727 Morrison, S.J., and Scadden, D.T. (2014). The bone marrow niche for haematopoietic stem cells.  
728 *Nature* 505, 327-334.

729 Natarajan, K.N., Miao, Z., Jiang, M., Huang, X., Zhou, H., Xie, J., Wang, C., Qin, S., Zhao, Z., Wu, L.,  
730 *et al.* (2019). Comparative analysis of sequencing technologies for single-cell transcriptomics. *Genome*  
731 *Biol* 20, 70.

732 Olivares-Navarrete, R., Hyzy, S.L., Park, J.H., Dunn, G.R., Haithcock, D.A., Wasilewski, C.E., Boyan,  
733 B.D., and Schwartz, Z. (2011). Mediation of osteogenic differentiation of human mesenchymal stem  
734 cells on titanium surfaces by a Wnt-integrin feedback loop. *Biomaterials* 32, 6399-6411.

735 Olivares-Navarrete, R., Rodil, S.E., Hyzy, S.L., Dunn, G.R., Almaguer-Flores, A., Schwartz, Z., and  
736 Boyan, B.D. (2015). Role of integrin subunits in mesenchymal stem cell differentiation and osteoblast



737 maturation on graphitic carbon-coated microstructured surfaces. *Biomaterials* 51, 69-79.

738 Parekkadan, B., and Milwid, J.M. (2010). Mesenchymal stem cells as therapeutics. *Annual review of*  
739 *biomedical engineering* 12, 87-117.

740 Park, S.J., Gadi, J., Cho, K.W., Kim, K.J., Kim, S.H., Jung, H.S., and Lim, S.K. (2011). The forkhead  
741 transcription factor Foxc2 promotes osteoblastogenesis via up-regulation of integrin beta1 expression.  
742 *Bone* 49, 428-438.

743 Pevsner-Fischer, M., Levin, S., and Zipori, D. (2011). The origins of mesenchymal stromal cell  
744 heterogeneity. *Stem cell reviews* 7, 560-568.

745 Phinney, D.G. (2012). Functional heterogeneity of mesenchymal stem cells: implications for cell  
746 therapy. *J Cell Biochem* 113, 2806-2812.

747 Pijuan Sala, B., Diamanti, E., Shepherd, M., Laurenti, E., Wilson, N.K., Kent, D.G., Gottgens, B.,  
748 Stuart, T., Butler, A., Hoffman, P., *et al.* (2019). Comprehensive Integration of Single-Cell Data. *Blood*  
749 177, 1888-1902.e1821.

750 Prockop, D.J. (1997). Marrow stromal cells as stem cells for nonhematopoietic tissues. *Science* 276,  
751 71-74.

752 Ranganath, S.H., Levy, O., Inamdar, M.S., and Karp, J.M. (2012). Harnessing the mesenchymal stem  
753 cell secretome for the treatment of cardiovascular disease. *Cell stem cell* 10, 244-258.

754 Ren, G., Zhang, L., Zhao, X., Xu, G., Zhang, Y., Roberts, A.I., Zhao, R.C., and Shi, Y. (2008).  
755 Mesenchymal stem cell-mediated immunosuppression occurs via concerted action of chemokines and  
756 nitric oxide. *Cell stem cell* 2, 141-150.

757 Romanov, Y.A., Svintsitskaya, V.A., and Smirnov, V.N. (2003). Searching for alternative sources of  
758 postnatal human mesenchymal stem cells: candidate MSC-like cells from umbilical cord. *Stem Cells*  
759 21, 105-110.

760 Rozario, T., and DeSimone, D.W. (2010). The extracellular matrix in development and morphogenesis:  
761 a dynamic view. *Dev Biol* 341, 126-140.

762 Russell, K.C., Phinney, D.G., Lacey, M.R., Barrilleaux, B.L., Meyertholen, K.E., and O'Connor, K.C.  
763 (2010). In vitro high-capacity assay to quantify the clonal heterogeneity in trilineage potential of  
764 mesenchymal stem cells reveals a complex hierarchy of lineage commitment. *Stem Cells* 28, 788-798.

765 Samsonraj, R.M., Rai, B., Sathiyathan, P., Puan, K.J., Rotzschke, O., Hui, J.H., Raghunath, M.,  
766 Stanton, L.W., Nurcombe, V., and Cool, S.M. (2015). Establishing criteria for human mesenchymal  
767 stem cell potency. *Stem Cells* 33, 1878-1891.

768 Schwalie, P.C., Dong, H., Zachara, M., Russeil, J., Alpern, D., Akchiche, N., Caprara, C., Sun, W.,  
769 Schlaudraff, K.U., Soldati, G., *et al.* (2018). A stromal cell population that inhibits adipogenesis in  
770 mammalian fat depots. *Nature* 559, 103-108.

771 Sethe, S., Scutt, A., and Stolzing, A. (2006). Aging of mesenchymal stem cells. *Ageing research*  
772 *reviews* 5, 91-116.

773 Tang, F., Barbacioru, C., Wang, Y., Nordman, E., Lee, C., Xu, N., Wang, X., Bodeau, J., Tuch, B.B.,  
774 Siddiqui, A., *et al.* (2009). mRNA-Seq whole-transcriptome analysis of a single cell. *Nature methods* 6,  
775 377-382.

776 Taşkıran, E.Z., and Karaosmanoğlu, B. (2019). Transcriptome analysis reveals differentially expressed  
777 genes between human primary bone marrow mesenchymal stem cells and human primary dermal  
778 fibroblasts. 43, 21-27.

779 Troyer, D.L., and Weiss, M.L. (2008). Wharton's jelly-derived cells are a primitive stromal cell  
780 population. *Stem Cells* 26, 591-599.



781 Via, A.G., Frizziero, A., and Oliva, F. (2012). Biological properties of mesenchymal Stem Cells from  
782 different sources. *Muscles, ligaments and tendons journal* 2, 154-162.

783 Wakitani, S., Imoto, K., Yamamoto, T., Saito, M., Murata, N., and Yoneda, M. (2002). Human  
784 autologous culture expanded bone marrow mesenchymal cell transplantation for repair of cartilage  
785 defects in osteoarthritic knees. *Osteoarthritis Cartilage* 10, 199-206.

786 Wang, H.S., Hung, S.C., Peng, S.T., Huang, C.C., Wei, H.M., Guo, Y.J., Fu, Y.S., Lai, M.C., and Chen,  
787 C.C. (2004). Mesenchymal stem cells in the Wharton's jelly of the human umbilical cord. *Stem Cells*  
788 22, 1330-1337.

789 Wang, Y., Barrett, A.N., Fong, C.Y., Subramanian, A., Liu, W., Feng, Y., Choolani, M., Biswas, A.,  
790 Rajapakse, J.C., and Bongso, A. (2019). Human Wharton's Jelly Mesenchymal Stem Cells Show  
791 Unique Gene Expression Compared with Bone Marrow Mesenchymal Stem Cells Using Single-Cell  
792 RNA-Sequencing. *Cell Death Dis* 28, 196-211.

793 Watt, S.M., Gullo, F., van der Garde, M., Markeson, D., Camicia, R., Khoo, C.P., and Zwaginga, J.J.  
794 (2013). The angiogenic properties of mesenchymal stem/stromal cells and their therapeutic potential.  
795 *Br Med Bull* 108, 25-53.

796 Wu, Y., Chen, L., Scott, P.G., and Tredget, E.E. (2007). Mesenchymal stem cells enhance wound  
797 healing through differentiation and angiogenesis. *Stem Cells* 25, 2648-2659.

798 Yang, Z.X., Han, Z.B., Ji, Y.R., Wang, Y.W., Liang, L., Chi, Y., Yang, S.G., Li, L.N., Luo, W.F., Li, J.P.,  
799 *et al.* (2013). CD106 identifies a subpopulation of mesenchymal stem cells with unique  
800 immunomodulatory properties. *PLoS One* 8, e59354.

801 Yip, S.H., Sham, P.C., and Wang, J. (2018). Evaluation of tools for highly variable gene discovery from  
802 single-cell RNA-seq data. *Briefings in bioinformatics*.

803 Yoo, K.H., Jang, I.K., Lee, M.W., Kim, H.E., Yang, M.S., Eom, Y., Lee, J.E., Kim, Y.J., Yang, S.K.,  
804 Jung, H.L., *et al.* (2009). Comparison of immunomodulatory properties of mesenchymal stem cells  
805 derived from adult human tissues. *Cell Immunol* 259, 150-156.

806 Zhang, J., Huang, X., Wang, H., Liu, X., Zhang, T., Wang, Y., and Hu, D. (2015). The challenges and  
807 promises of allogeneic mesenchymal stem cells for use as a cell-based therapy. *Stem Cell Res Ther* 6,  
808 234.

809 Zuk, P.A., Zhu, M., Ashjian, P., De Ugarte, D.A., Huang, J.I., Mizuno, H., Alfonso, Z.C., Fraser, J.K.,  
810 Benhaim, P., and Hedrick, M.H. (2002). Human adipose tissue is a source of multipotent stem cells.  
811 *Mol Biol Cell* 13, 4279-4295.

812

813

814

815

816

817

818
